# Supplementary material for: Using Sensitivity Analysis to Develop a Validated Computational Model of Post-operative Calvarial Growth in Sagittal Craniosynostosis
Source: PubMed Central journal article supplement (PMC8187911; doi:10.3389/fcell.2021.621249), 2021-05-26

Supplementary figures

Supplementary 1: CSF elastic modulus sensitivity, contact pressure across the brain/ICV.

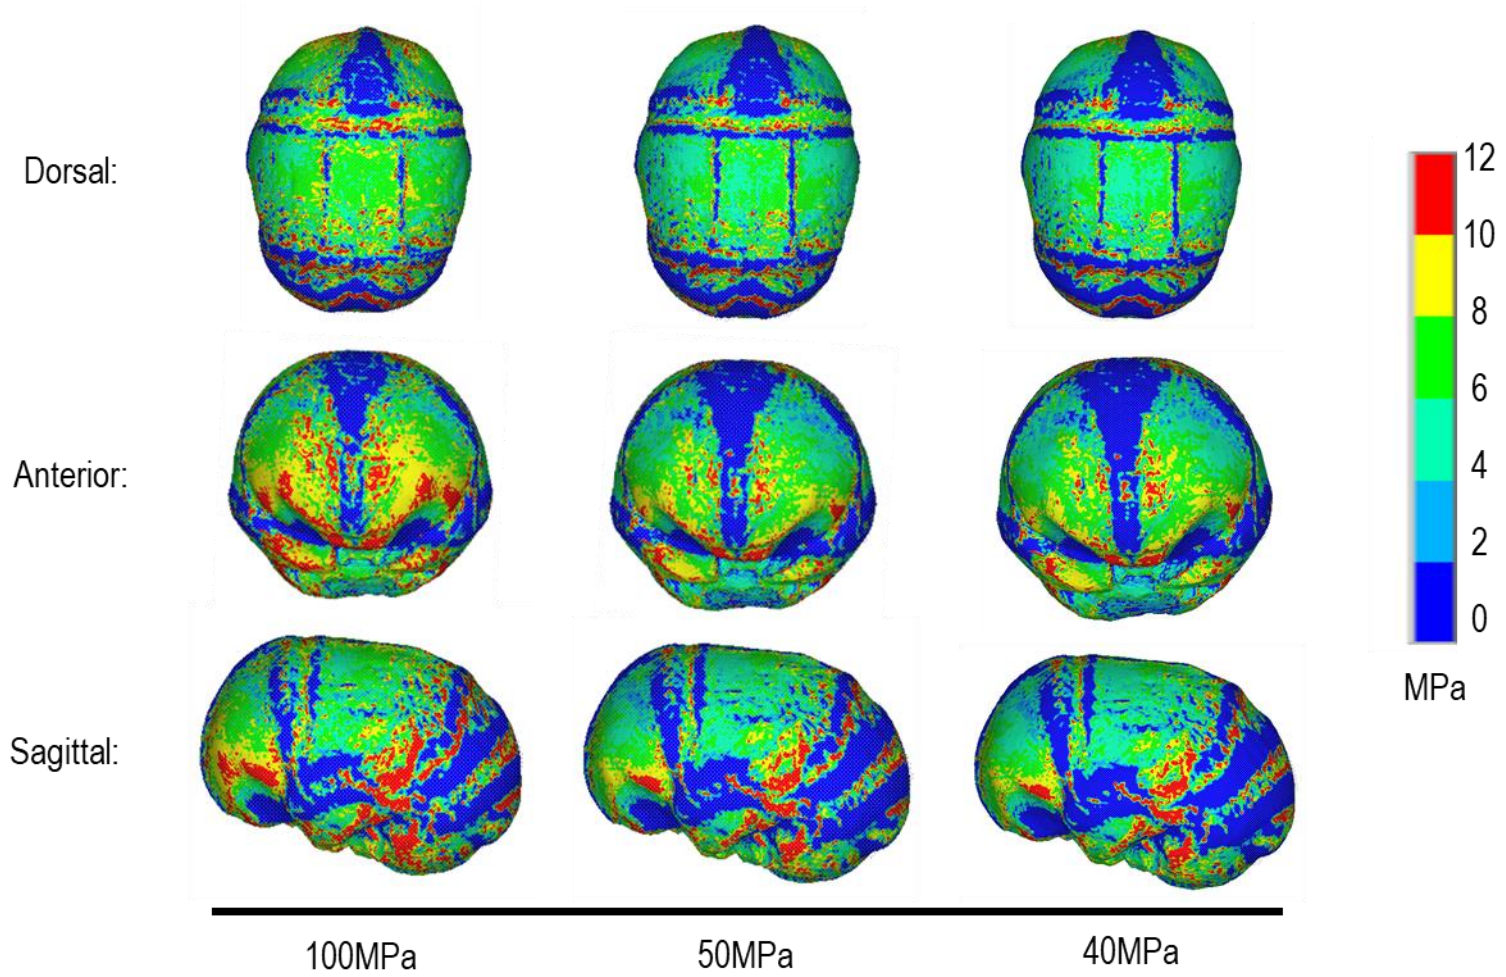

Supplement: Image_1.pdf [file Image_1.pdf]
